# Supplementary material for: A chromosomally encoded T7 RNA polymerase-dependent gene expression system for Corynebacterium glutamicum: construction and comparative evaluation at the single-cell level
Source: PubMed Central journal article supplement (PMC4353339; doi:10.1111/1751-7915.12236), 2014-12-09
Supplement: mbt20008-0253-sd1.pdf [file mbt20008-0253-sd1.pdf]

## Supplemental material to Kortmann et al. 2014

cg1122 <--

GGAAATAGGGGCCTTTTGTGTCTTCTCCTGGAGGCTATTTAAGAAGTTTAAATTTGTGTCCATGAGTTTCG  
**CTCGAG**AACTGCGCAACTCGTGAAAGGTAGGCGGATCCAGATCCCGGACACCATCGAATGGCGCAAAAACC  
TTTCGCGGTATGGCATGATAGCGCCCCGGAAGAGAGTCAATTCAGGGTGGTGAATGTGAAACCAGTAACGT  
TATACGATGTGCGCAGAGTATGCCGGTGTCTCTTATCAGACCGTTTCCCGCGTGGTGAACCAGGCCAGCCA  
CGTTTCTGCGAAAACGCGGGAAAAAGTGGAAGCGGCGATGGCGGAGCTGAATTACATTCCCAACCGCGTG  
GCACAACAACCTGGCGGGCAAACAGTCTGTTGCTGATTGGCGTTGCCACCTCCAGTCTGGCCCTGCACGCGC  
CGTCGCAAATTTGTCGCGGCGATTAAATCTCGCGCCGATCAACTGGGTGCCAGCGTGGTGGTGTGCGATGGT  
AGAACGAAGCGGCGTGAAGCCTGTAAAGCGGCGGTGCACAATCTTCTCGCGCAACCGCTCAGTGGGCTG  
ATCATTAACTATCCGCTGGATGACCAGGATGCCATTGCTGTGGAAGCTGCCTGCACTAATGTTCCGGCGT  
TATTTCTTGATGTCTCTGACCAGACACCCATCAACAGTATTATTTTCTCCCATGAAGACGGTACGCGACT  
GGGCGTGGAGCATCTGGTTCGATTGGGTACCAGCAAATCGCGCTGTTAGCGGGCCATTAAGTTCTGTCT  
TCGGCGCTCTGCGTCTGGCTGGCTGGCATAAATATCTCACTCGCAATCAAATTCAGCCGATAGCGGAAC  
GGGAAGGCGACTGGAGTGCCATGTCCGGTTTTCAACAAACCATGCAAATGCTGAATGAGGGCATCGTTCC  
CACTGCGATGCTGGTTGCCAACGATCAGATGGCGCTGGGCGCAATGCGCGCCATTACCAGTCCGGGCTG  
CGCGTTGGTGC GGATATCTCGGTAGTGGGATACGACGATACCGAAGACAGCTCATGTTATATCCCGCCGT  
TAACCACCATCAAACAGGATTTTCGCCTGCTGGGGCAAACCAGCGTGGACCGCTTGCTGCAACTCTCTCA  
GGGCCAGGCGGTGAAGGGCAATCAGCTGTTGCCCGTCTCACTGGTGAAGAAAGAAAAACCACCTGGCGCCC  
AATACGCAAACCGCCTCTCCCGCGCGGTTGGCCGATTCAATTAATGCAGCTGGCACGACAGGTTTCCCGAC  
TGGAAAGCGGGCAGTGAGCGCAACGCAATTAATGTAAGTTAGCTCACTCATTAGGCACCCAGGCTTTAC  
ACTTTATGCTTCCGGCTCGTATAATGTGTGGAATTTGTGAGCGGATAACAATTTACACACAGGAAAACAGCTA  
TGACCATGATTACGGATTCACTGGCCGTCGTTTTACAACGTCGTGACTGGGAAAACCTTGGCGTTACCCA  
ACTTAATCGCCTTGCGCACATCCCCCTTTTCGCCAGCTGGCGTAATAGCGAAGAGGCCCGCACCGATCGC  
CCTTCCCAACAGTTGCGCAGCCTGAATGGCGAATGGCGCTTTGCCTGGTTTCCGGCACCAGAAGCGGTGC  
CGGAAAGCTGGCTGGAGTGC GATCTTCTGAGGCCGATACTGTGCTCGTCCCCTCAAACCTGGCAGATGCA  
CGGTTACGATGCGCCCATCTACACCAACGTGACCTATCCCATTACGGTCAATCCGCCGTTTGTTCACG  
GAGAATCCGACGGGTTGTTACTCGCTCACATTTAATGTTGATGAAAGCTGGCTACAGGAAGGCCAGACGC  
GAATTATTTTTGATGGCGTCGGGATCTGATCCGGATTTACTAACTGGAAGAGGCACTAAATGAACACGAT  
TAACATCGCTAAGAACGACTTCTCTGACATCGAAGTGGCTGCTATCCCGTTCAACACTCTGGCTGACCAT  
TACGGTGAGCGTTTAGCTCGCGAACAGTTGGCCCTTGAGCATGAGTCTTACGAGATGGGTGAAGCACGCT  
TCCGCAAGATGTTTGAGCGTCAACTTAAAGCTGGTGAGGTTGCGGATAACGCTGCCGCCAAGCCTCTCAT  
CACTACCCTACTCCCTAAGATGATTGCACGCATCAACGACTGGTTTTGAGGAAGTGAAAGCTAAGCGCGGC  
AAGCGCCCCGACAGCCTTCCAGTTCCCTGCAAGAAATCAAGCCGGAAGCCGTAGCGTACATCACCATTAAGA  
CCACTCTGGCTTGCCTAACAGTGCTGACAATACAACCGTTTCAGGCTGTAGCAAGCGCAATCGGTCCGGC  
CATTGAGGACGAGGCTCGTTCCGGTCGTATCCGTGACCTTGAAGCTAAGCACTTCAAGAAAAACGTTGAG  
GAACAACCTCAACAAGCGCGTAGGGCACGTCTACAAGAAAGCATTATGCAAGTTGTGAGGCTGACATGC  
TCTCTAAGGTTACTCGGTGGCGAGGCGTGGTCTTCGTGGCATAAGGAAGACTCTATTCATGTAGGAGT  
ACGCTGCATCGAGATGCTCATTGAGTCAACCGGAATGGTTAGCTTACACCGCCAAAAATGCTGGCGTAGTA  
GGTCAAGACTCTGAGACTATCGAAGTTCGACCTGAATACGCTGAGGCTATCGCAACCCGTGCAGGTGCGC  
TGGCTGGCATCTCTCCGATGTTCCAACCTTGCCTAGTTCCCTCCTAAGCCGTGGACTGGCATTACTGGTGG  
TGGCTATTGGGCTAACGGTCGTGCTCCTCTGGCGCTGGTGCCTACTCACAGTAAGAAAGCACTGATGCGC  
TACGAAGACGTTTACATGCCTGAGGTGTACAAAGCGATTAACATTGCGCAAAAACCCGCATGGAAAAATCA  
ACAAGAAAGTCTTAGCGGTGCGCAACGTAATCACCAAGTGAAGCATTGTCCGGTCGAGGACATCCCTGC  
GATTGAGCGTGAAGAACTCCCGATGAAACCGGAAGACATCGACATGAATCCTGAGGCTCTCACCGCGTGG  
AAACGTGCTGCCGCTGCTGTGTACCGCAAGGACAAGGCTCGCAAGTCTCGCCGTATCAGCCTTGAGTTCA  
TGCTTGAGCAAGCCAATAAGTTTTGCTAACCATAAAGGCCATCTGGTTCCCTTACAACATGGACTGGCGCGG  
TCGTGTTTTACGCTGTGTCAATGTTCAACCCGCAAGGTAACGATATGACCAAAGGACTGCTTACGCTGGCG  
AAAGGTAACCAATCGGTAAGGAAGGTTACTACTGGCTGAAAATCCACGGTGCAAACCTGTGCGGGTGTGCG  
ATAAGGTTCCGTTCCCTGAGCGCATCAAGTTTATTGAGGAAAACACGAGAACATCATGGCTTGCCTAA  
GTCTCCACTGGAGAACACTTGGTGGGCTGAGCAAGATTCTCCGTTCTGCTTCCCTTGGCTTCTGCTTTGAG

```
TACGCTGGGGTACAGCACCACGGCCTGAGCTATAACTGCTCCCTTCCGCTGGCGTTTGACGGGTCTTGCT
CTGGCATCCAGCACTTCTCCGCGATGCTCCGAGATGAGGTAGGTGGTCGCGCGGTTAACTTGCTCCTAG
TGAAACCGTTTCAGGACATCTACGGGATTGTTGCTAAGAAAGTCAACGAGATTCTACAAGCAGACGCAATC
AATGGGACCGATAACGAAGTAGTTACCGTGACCGATGAGAACACTGGTGAAATCTCTGAGAAAAGTCAAGC
TGGGCACCTAAGGCACTGGCTGGTCAATGGCTGGCTTACGGTGTTACTCGCAGTGTGACTAAGCGTTCAGT
CATGACGCTGGCTTACGGGTCCAAAGAGTTCGGCTTCCGTCAACAAGTGTGGAAGATAACCATTCAGCCA
GCTATTGATTCCGGCAAGGGTCTGATGTTCACTCAGCCGAATCAGGCTGCTGGATACATGGCTAAGCTGA
TTTGGGAATCTGTGAGCGTGACGGTGGTAGCTGCGGTTGAAGCAATGAACTGGCTTAAGTCTGCTGCTAA
GCTGCTGGCTGCTGAGGTCAAAGATAAGAAGACTGGAGAGATTCTTCGCAAGCGTTGCGCTGTGCATTGG
GTAACCTCTGATGGTTTTCCCTGTGTGGCAGGAATACAAGAAGCCTATTCAGACGCGCTTGAACCTGATGT
TCCTCGGTCAGTTCGCTTACAGCCTACCATTAACACCAACAAAGATAGCGAGATTGATGCACACAAAACA
GGAGTCTGGTATCGCTCCTAACTTTGTACACAGCCAAGACGGTAGCCACCTTCGTAAGACTGTAGTGTGG
GCACACGAGAAGTACGGAATCGAATCTTTTGCCTGATTACGACTCCTTCGGTACCATTCCGGCTGACG
CTGCGAACCTGTTCAAAGCAGTGCGCGAAACTATGGTTGACACATATGAGTCTTGTGATGTACTGGCTGA
TTTCTACGACCAGTTCGCTGACCAGTTGCACGAGTCTCAATTGGACAAAATGCCAGCACTTCCGGCTAAA
GGTAACTTGAACCTCCGTGACATCTTAGAGTCGGACTTCGCGTTCGCGTAACGAATTCGCGTATGGCAAT
GACAGTTTTGAGACGGCCACAGGCGATTCTGAGAAGCCATTTTCTTTGGGCGCCGTGGCAGTTTTTTATTGG
--> cg1121
```

**Fig. S1.** Sequence of the 4,46 kb fragment amplified from the genome of *E. coli* BL21(DE3) and inserted into the intergenic region of cg1122-cg1121 of *C. glutamicum* MB001. 70 bp and 85 bp of the flanking *C. glutamicum* genome region are also shown with a grey background. The XhoI and EcoRI restriction sites used for cloning are shown in bold.

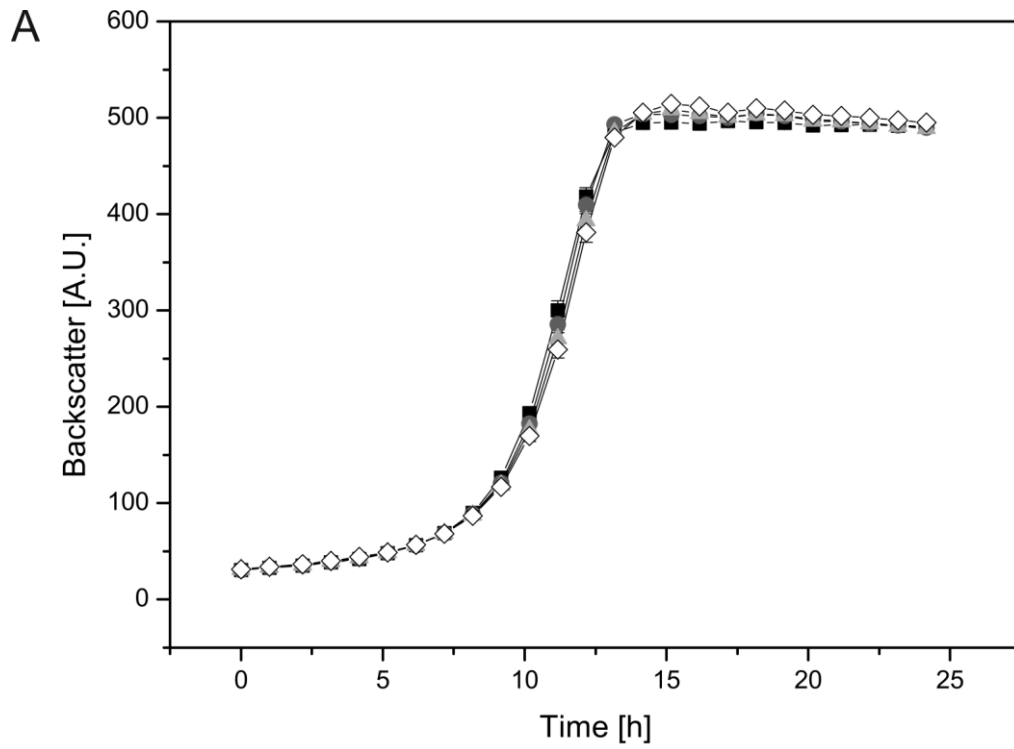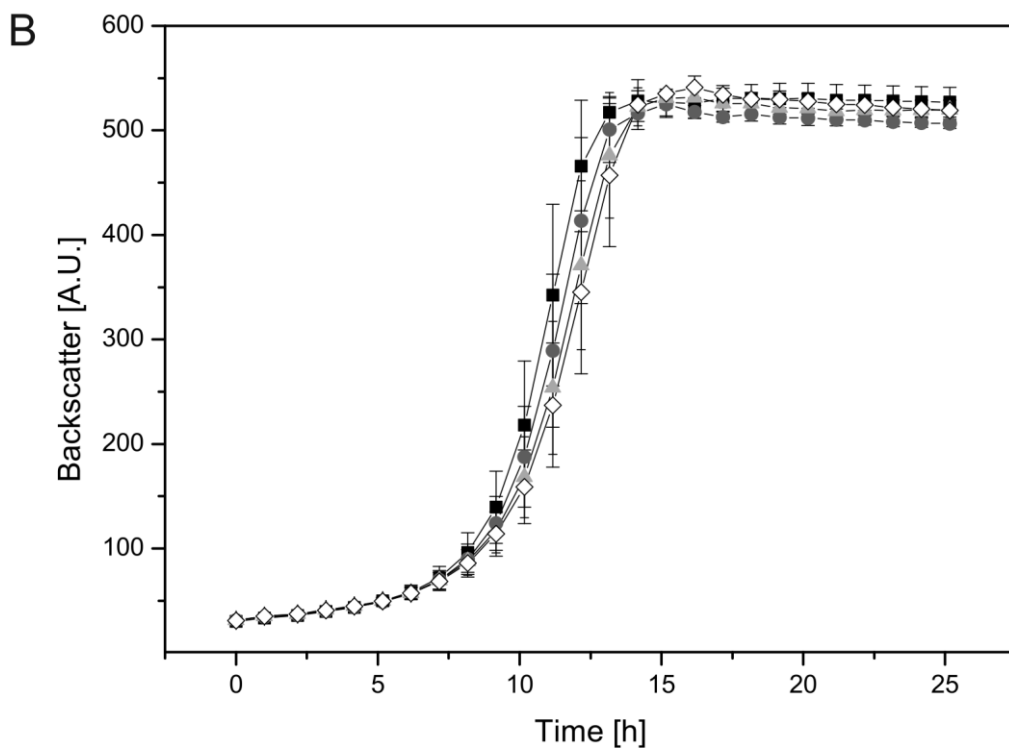

**Fig. S2.** Growth of *C. glutamicum* MB001/pEKEx2-eyfp (A) and *C. glutamicum* MB001(DE3)/pMKEx2-eyfp (B). The strains were inoculated to an OD<sub>600</sub> of 1 and cultivated for 24 h at 30°C in CGXII minimal medium with 4% (wt/vol) glucose using a BioLector system. Induction of *eyfp* expression was triggered by adding 0 μM (■), 50 μM (●), 100 μM (▲), or 250 μM (◇) IPTG to the cultures after 2 h.

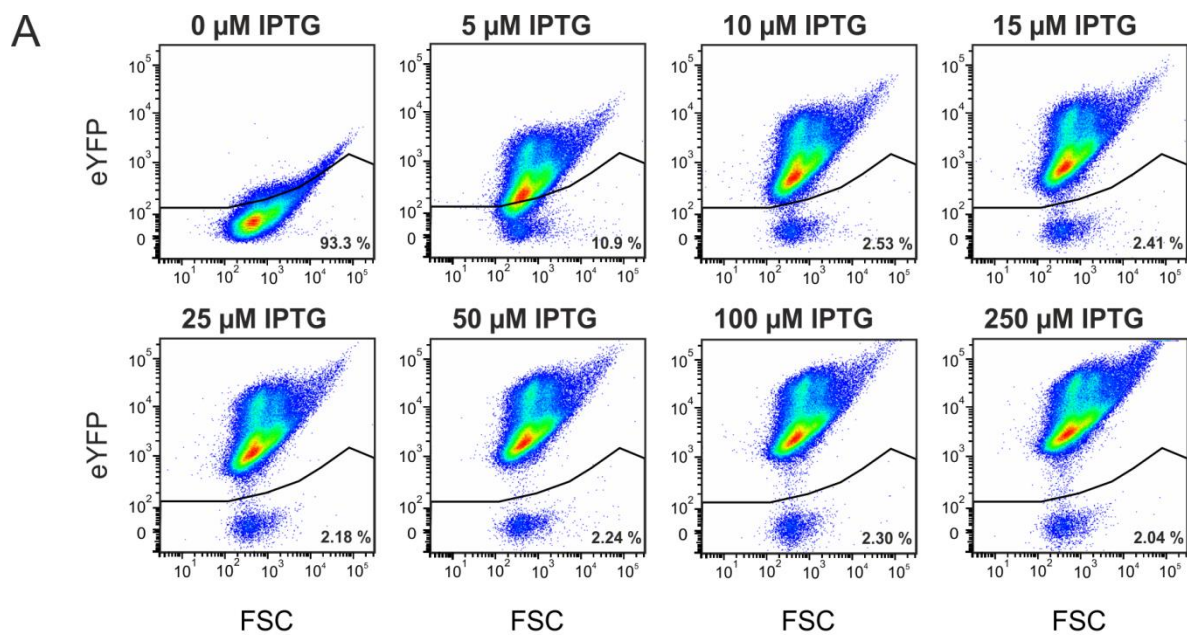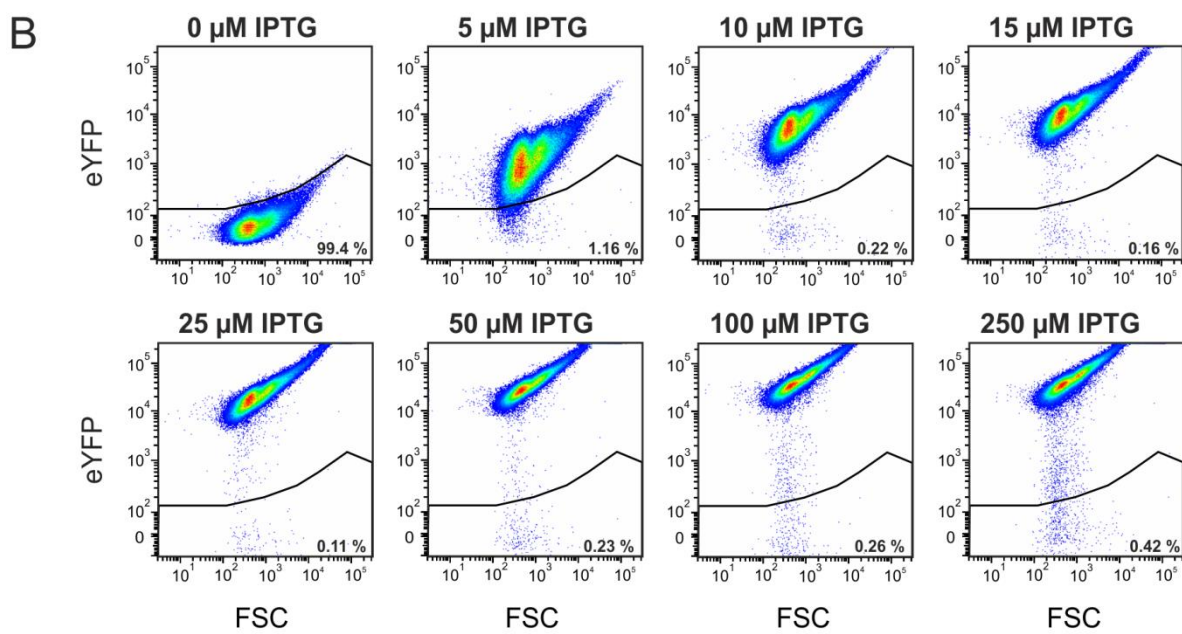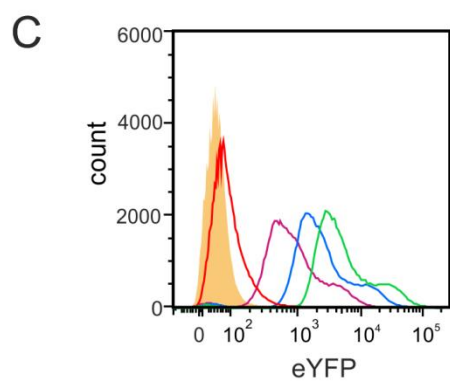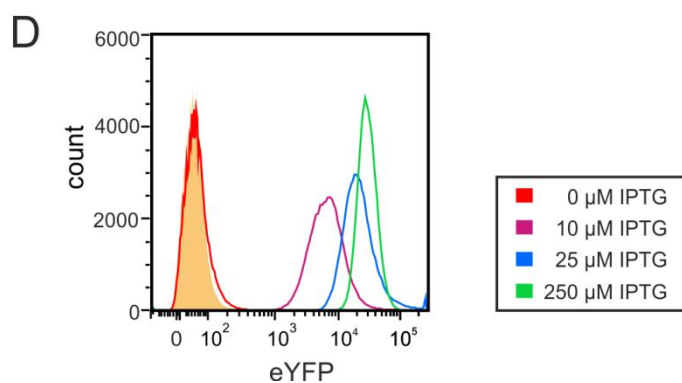

**Fig. S3.** Analysis of heterologous eYFP production in the *C. glutamicum* strains MB001/pEKEx2-*eyfp* (A) and MB001(DE3)/pMKEx2-*eyfp* (B) at the single cell level by flow cytometry. The strains were cultivated for 24 h at 30°C in CGXII minimal medium with 4% (wt/vol) glucose using a BioLector system. Induction of *eyfp* expression was triggered by adding the indicated concentrations of IPTG to the cultures after 2 h. Dot blots from FACS analysis (excitation at 488 nm, emission at 533 nm) of at least 100,000 cells of each strain displaying the eYFP fluorescence signal against the forward scatter signal (FSC). The gate used to define non-fluorescent cells was set with *C. glutamicum* MB001(DE3)/pMKEx2 with 100 % of the cells falling into this gate (data not shown). The number inside the panels indicates the percentage of non-fluorescent cells inside this gate. In panels C and D, histograms of strains MB001/pEKEx2-*eyfp* (C) and MB001(DE3)/pMKEx2-*eyfp* (D) cultivated without IPTG or in the presence of 10, 25, and 250  $\mu$ M IPTG are shown. The orange peaks indicate the background fluorescence set with strain MB001(DE3)/pMKEx2. The number of cells is plotted vs. eYFP fluorescence.

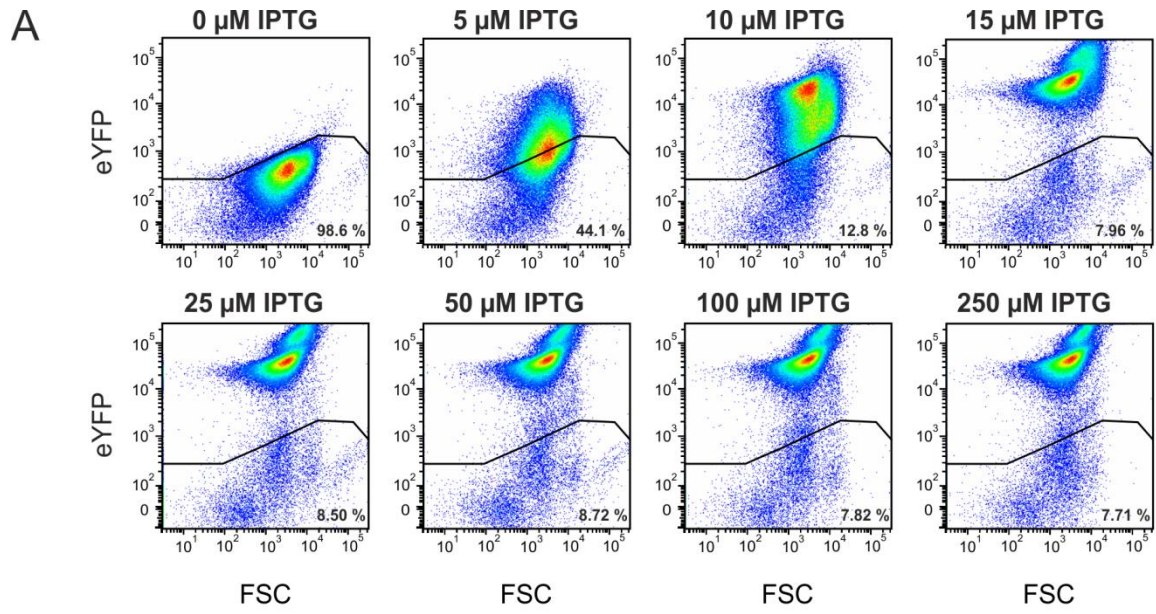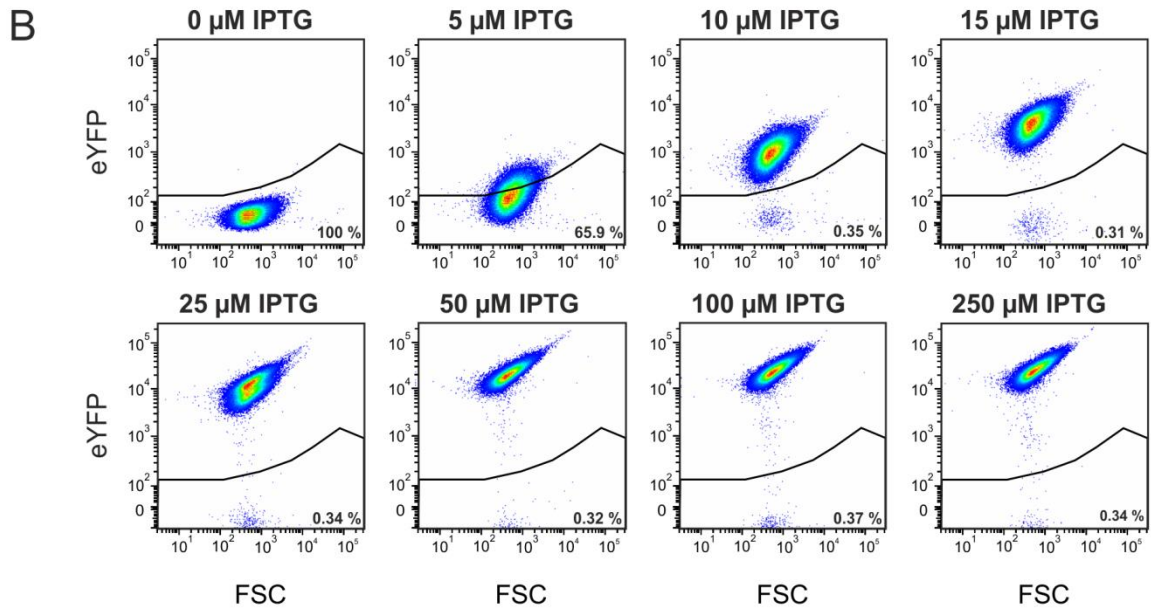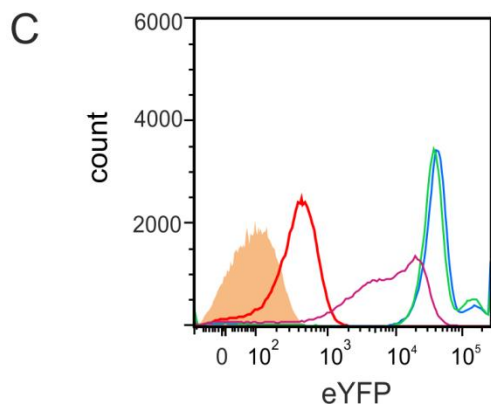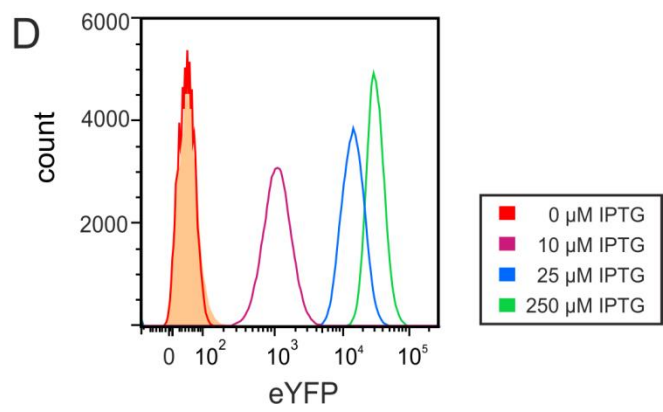

**Fig. S4.** Analysis of heterologous eYFP production in *C. glutamicum* MB001(DE3)/pMKEx2-*eyfp* (A) and *E. coli* BL21(DE3)/pEKEx2-*eyfp* (B) at the single cell level. The strains were cultivated for 24 h at 30°C in 2xTY medium using a BioLector system. Induction of *eyfp* expression was triggered by adding the indicated concentrations of IPTG to the cultures after 2 h. Dot plots from FACS analysis (excitation at 488 nm, emission at 533 nm) of at least 100,000 cells of each strain displaying the eYFP signal against the forward scatter signal (FSC) are shown. The gate used to define non-fluorescent cells was set with *C. glutamicum* MB001/pMKEx2 or *E. coli* BL21(DE3)/pMKEx2, respectively, with 100 % of the cells falling into this gate (data not shown). The number inside the panels indicates the percentage of non-fluorescent cells. In panels C and D, histograms of strains *E. coli* BL21(DE3)/pMKEx2-*eyfp* (C) and *C. glutamicum* MB001(DE3)/pMKEx2-*eyfp* (D) cultivated without IPTG or in the presence of 10, 25, and 250  $\mu$ M IPTG are shown. The orange peaks indicate the background fluorescence set with strain strain *E. coli* BL21(DE3)/pMKEx2 and *C. glutamicum* MB001(DE3)/pMKEx2. The number of cells is plotted vs. eYFP fluorescence.
